# Supplementary material for: Engineering highly stretchable lignin-based electrospun nanofibers for potential biomedical applications
Source: Royal Society of Chemistry journal article supplement (doi:10.1039/c5tb00765h), 2015-01-01

### Supporting information

Engineering highly stretchable lignin-based electrospun nanofibers for potential  
biomedical applications

Dan Kai<sup>1\*</sup>, Jiang Shan<sup>1</sup>, Zhi Wei Low<sup>2</sup>, Xian Jun Loh<sup>1,2,3\*</sup>

<sup>1</sup>Institute of Materials Research and Engineering (IMRE), A\*STAR, 3 Research Link,  
Singapore 117602, Singapore

<sup>2</sup>Department of Materials Science and Engineering, National University of Singapore,  
9 Engineering Drive 1, Singapore 117576, Singapore

<sup>3</sup>Singapore Eye Research Institute, 11 Third Hospital Avenue, Singapore 168751,  
Singapore

E-mail: [kaid@imre.a-star.edu.sg](mailto:kaid@imre.a-star.edu.sg), [lohxj@imre.a-star.edu.sg](mailto:lohxj@imre.a-star.edu.sg)

Fig. S1 <sup>1</sup>H of NMR spectra of lignin and lignin-Br in DMSO-d<sub>6</sub>.

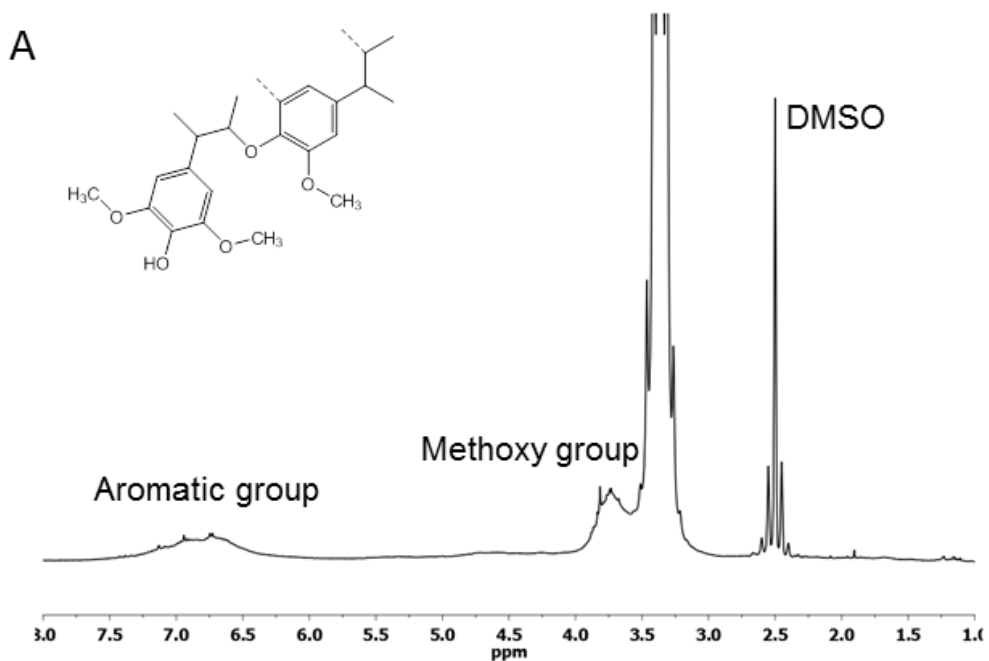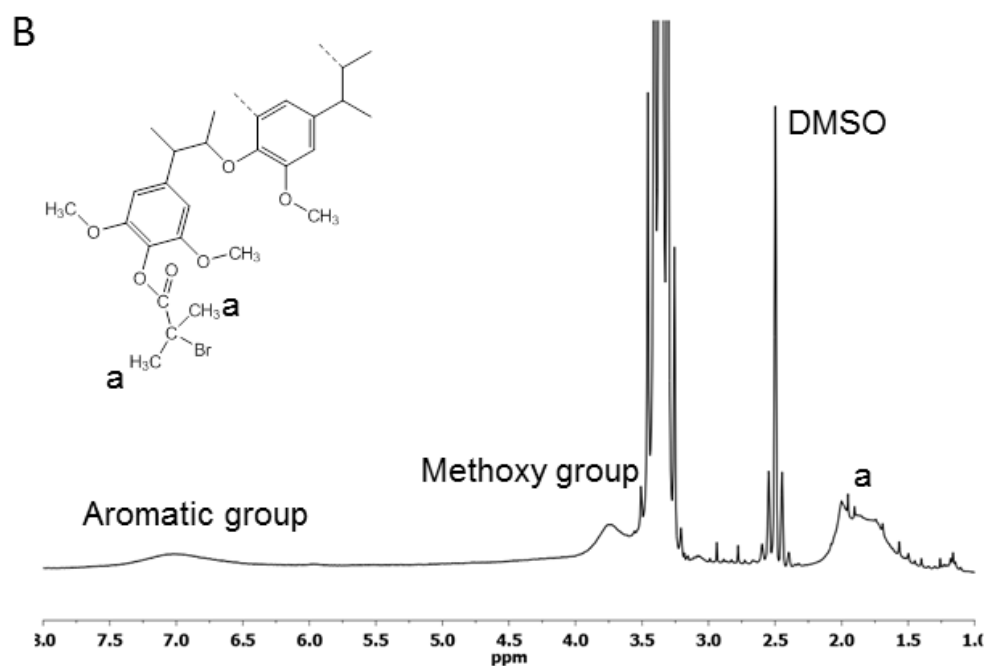

Fig. S2 TGA curve of PMMA and the  $T_{d5}$  (the temperature at which the mass of the sample is 50% less than its mass measured at 50°C) of lignin and lignin-PMMA copolymers.

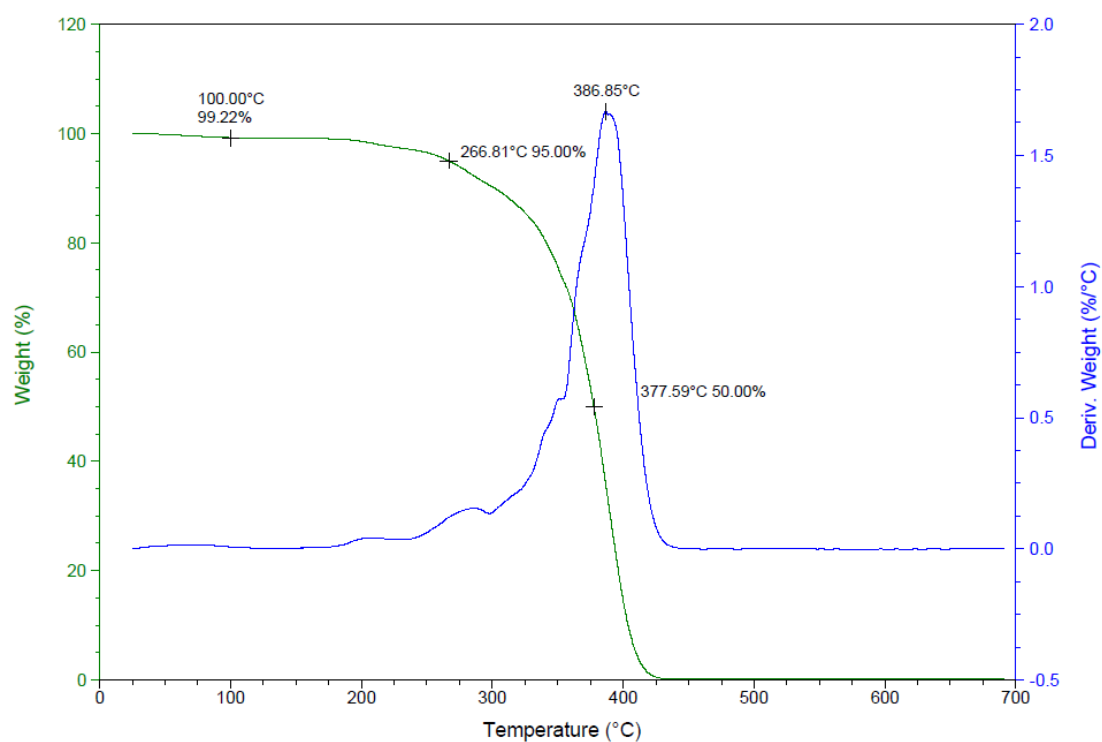

| Polymers | $T_{d5}$ (°C) |
|----------|---------------|
| Lignin   | 260           |
| LM30     | 199           |
| LM50     | 221           |
| LM70     | 297           |
| LM100    | 314           |
| PMMA     | 267           |

Fig. S3 DSC curves of PCL and PCL/lignin-PMMA nanofibers. (A) The comparison of nanofibers containing 50% of different lignin-PMMA copolymers, (B) the comparison of nanofibers containing different amounts of LM70.

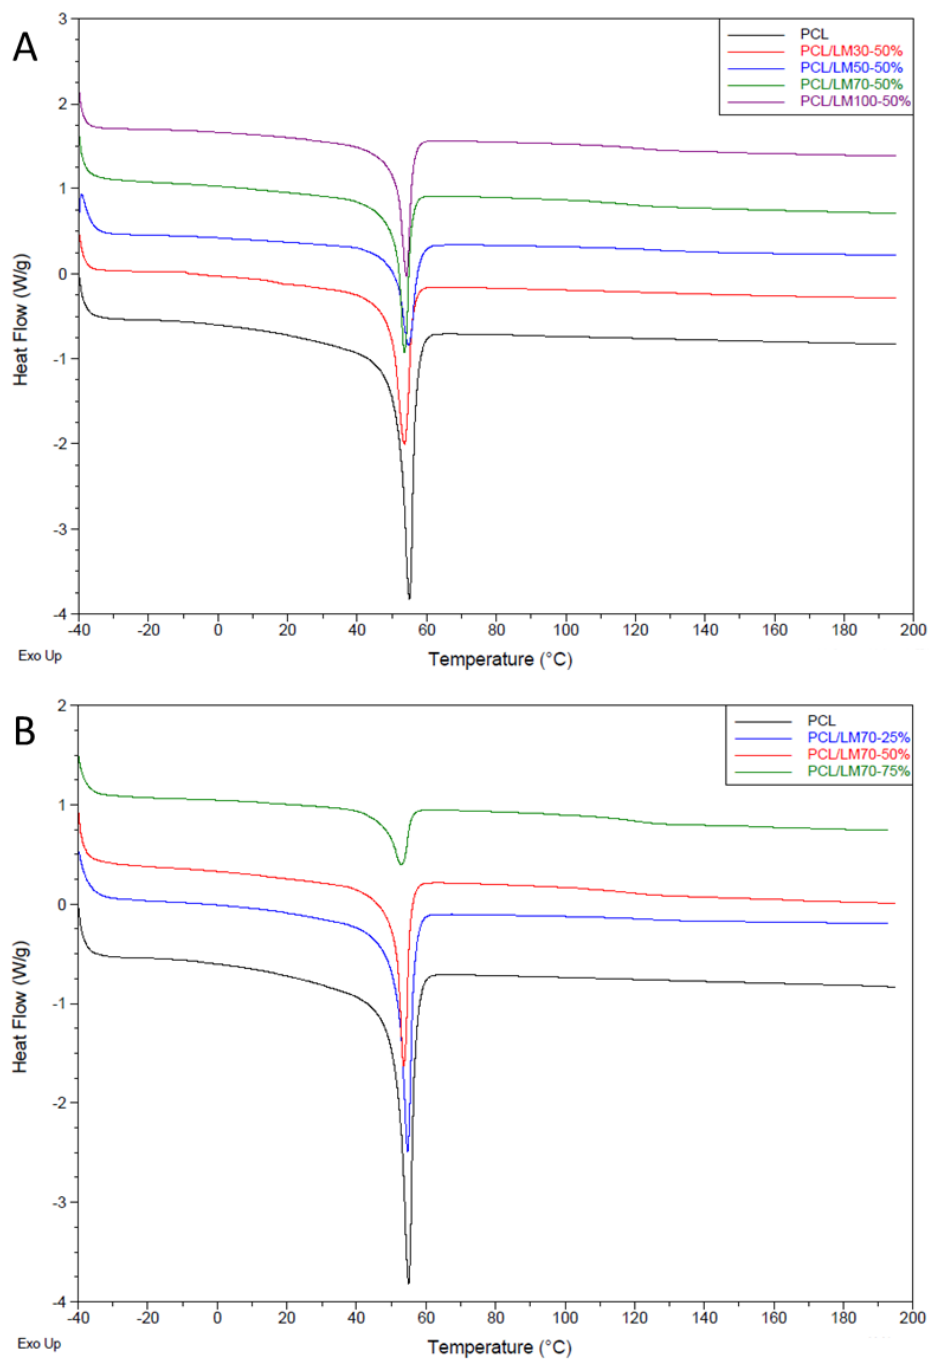

Fig. S4 TGA curves of PCL and PCL/lignin-PMMA nanofibers. (A) The comparison of nanofibers containing 50% of different lignin-PMMA copolymers, (B) the comparison of nanofibers containing different amounts of LM70.

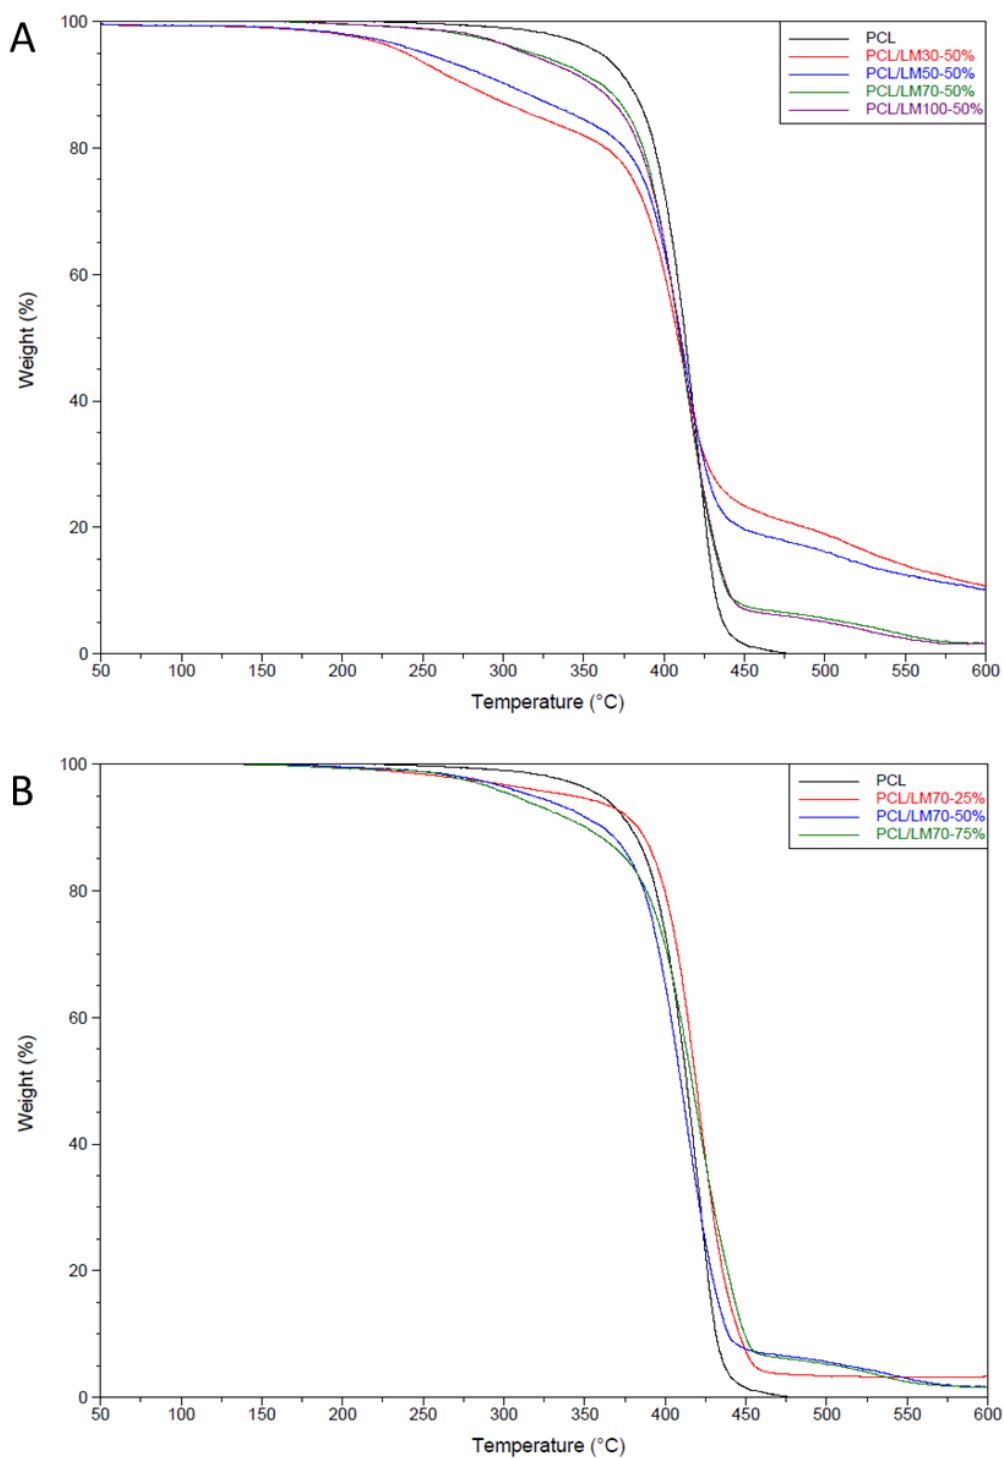

Fig. S5 Morphology of human dermal fibroblasts on electrospun nanofibers (A, C) PCL/LM50-50, (B, D) PCL/LM70-50 after 7 days of culture. C and D are the corresponding images of A to B at a higher magnification, showing the interactions between cells.

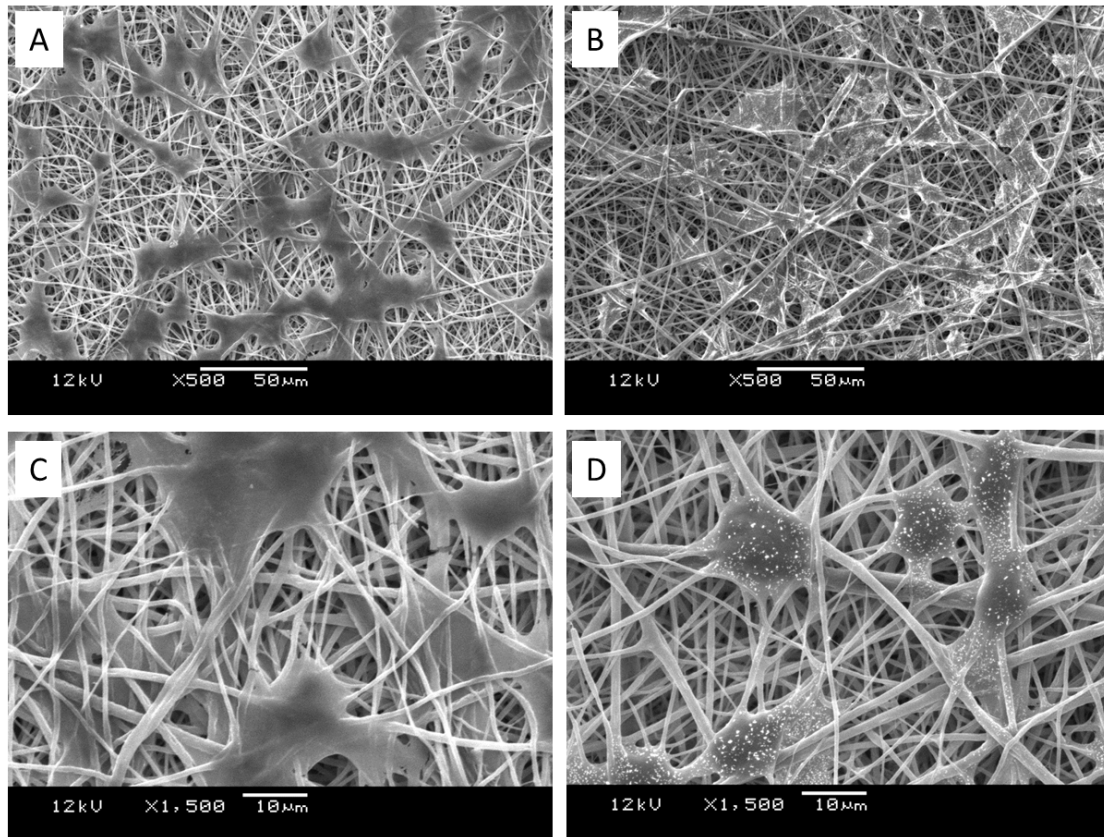

Fig. S6 Laser scanning confocal microscopic images of human dermal fibroblasts on electrospun nanofibers (A) PCL/LM50-50, (B) PCL/LM70-50 immunostained for F-actin (Green) and nuclei (Blue).

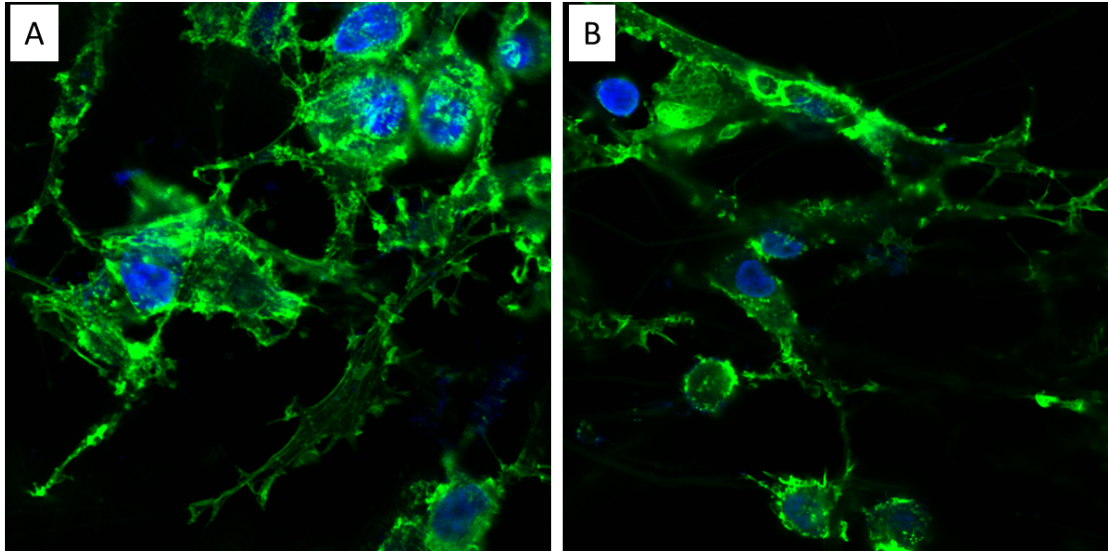

Supplement: c5tb00765h1.pdf [file c5tb00765h1.pdf]
